# Supplementary material for: The Impact of Plant-Based Coatings in “ROCHA” Pear Preservation during Cold Storage: A Metabolomic Approach
Source: MDPI journal article supplement (doi:10.3390/foods9091299), 2020-09-15
Supplement: s1 [file s1]

A heatmap visualization showing the relative concentrations of 15 chemical compounds across 15 samples. The compounds are listed on the right, and the samples are labeled at the bottom. Hierarchical clustering dendrograms are present on the top and left sides. A color scale on the right indicates values from -4 (blue) to 4 (red), with 0 being white.

**Compounds (Rows):**

- class
- 1-pentanol
- 1-butanol
- 1-hexanol
- alfa-Farnese
- 2-ethyl-1-hexanol
- hexanol
- propyl acetate
- 2-methylpropyl ace
- butyl acetate
- pentyl acetate
- hexyl acetate
- heptyl acetate
- ethyl hexanoate
- Limonene
- 2-methyl-1-butanol
- 2-methyl-1-propano
- 3-hydroxy-2-butano

**Samples (Columns):**

- PCT\_5
- CTL\_5
- CTL\_1
- CTL\_2
- PCT\_4
- PCT\_3
- CTL\_4
- PCT\_4
- CTR\_5
- CTR\_2
- CTR\_3
- CTR\_4
- PCT\_1
- CTR\_1
- CTR\_1
- CTL\_3
- CTR\_2
- CTR\_3
