# Supplementary material for: The Impact of Plant-Based Coatings in “ROCHA” Pear Preservation during Cold Storage: A Metabolomic Approach
Source: MDPI journal article supplement (doi:10.3390/foods9091299), 2020-09-15
Supplement: s1 [file s1]

## Hydroethanolic Extraction

## Coating formulation

## Coating application

## Cold-storage

Strawberry  
tree leaves

Apple  
pomace

Control (CTR)

Pectin (PCT)  
(3% w/v)

Coating 1 (CT1)  
Extract (9.53  
mg/mL) + Pectin  
(3% w/v)

Coating 2 (CT2)  
Extract (16  
mg/mL) + Pectin  
(3% w/v)

Normal atmosphere (2 °C)

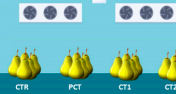

Dynamic controlled atmosphere  
(-0.5 °C, 0.5% O<sub>2</sub> and 0.4% CO<sub>2</sub>)

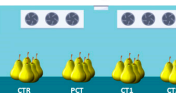

## Parameters measurement

Data processing

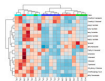

GC×GC-ToFMS

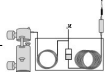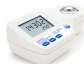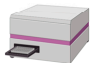

Abs 281-290nm

HS-SPME\*\*

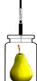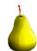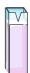

Volatile  
Compounds

Ripening  
(TSS)

Conjugated  
Trienols (CTs)

Visual control  
of the colour  
(Hue angle)

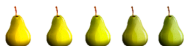

Sampling  
(days)\*

9

32

73

101

134

n=5
