# Supplementary figures and images for: The Impact of Plant-Based Coatings in “ROCHA” Pear Preservation during Cold Storage: A Metabolomic Approach
Source: MDPI journal article supplement (doi:10.3390/foods9091299), 2020-09-15

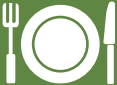

*foods*

Supplement: s1 [file s1]

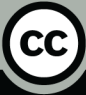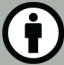

BY

Supplement: s1 [file s1]

9 days

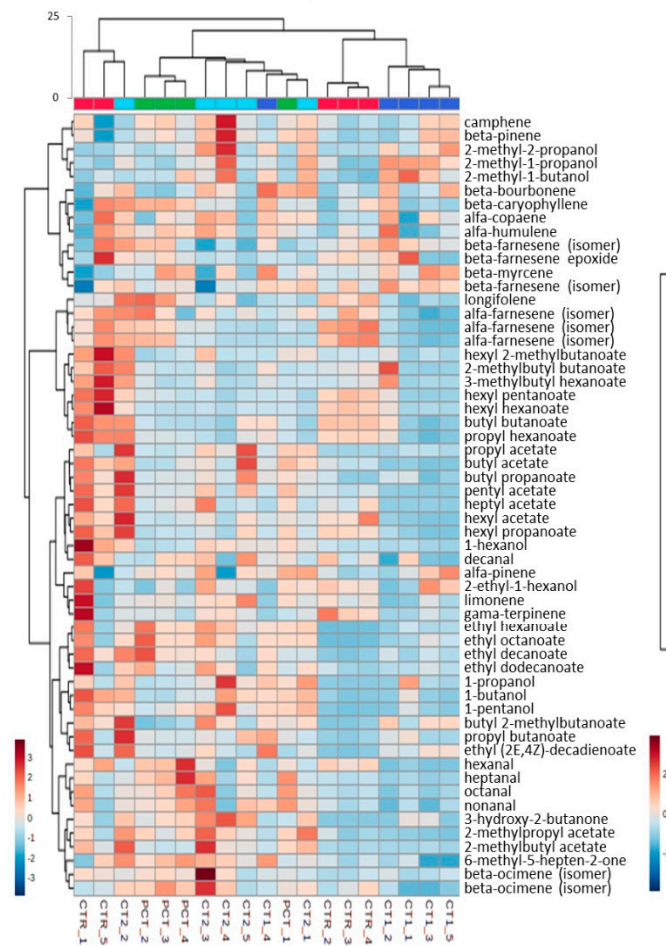

32 days

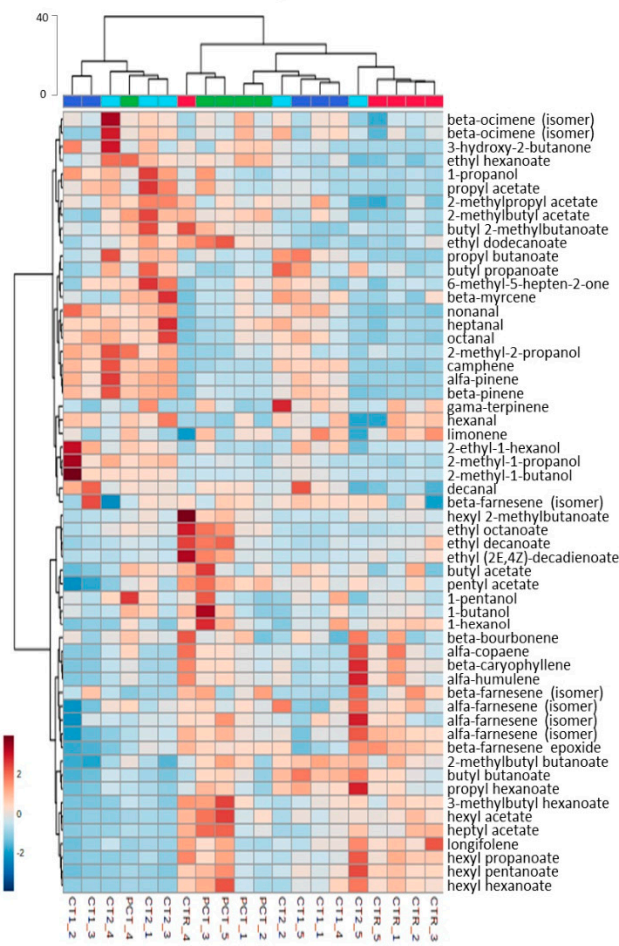

134 days

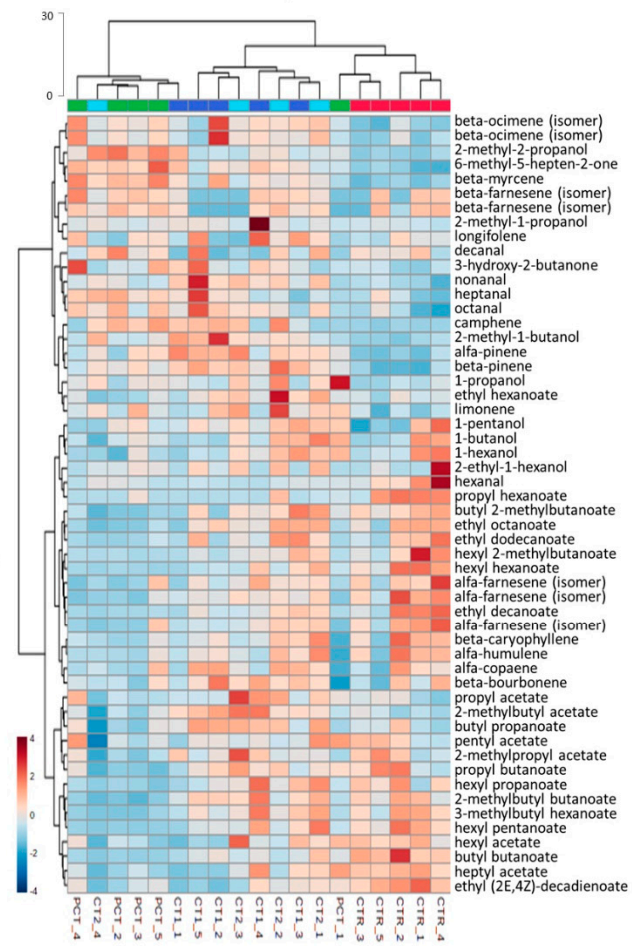

Supplement: s1 [file s1]

9 days

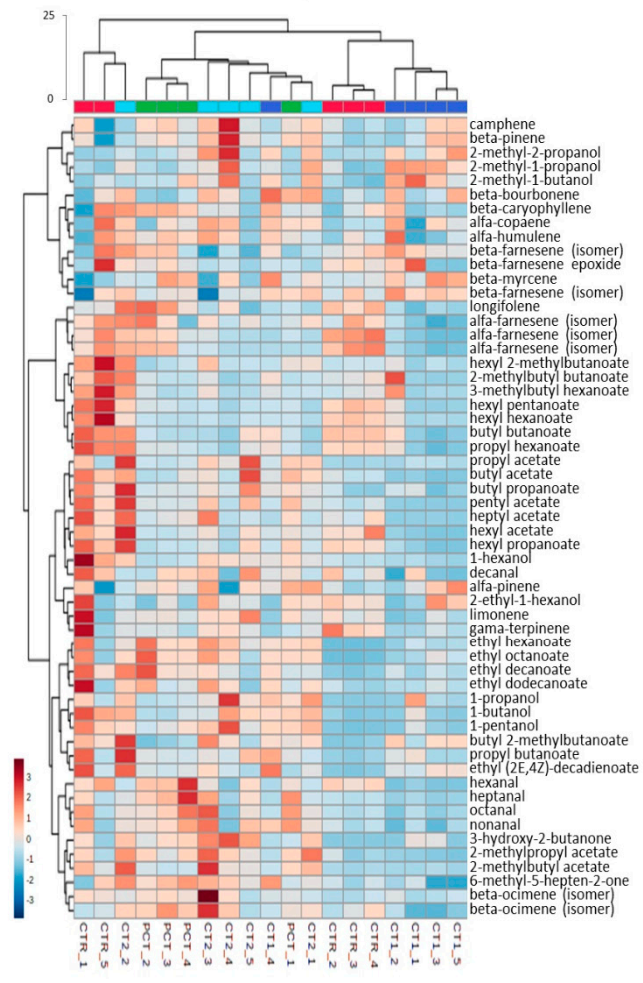

32 days

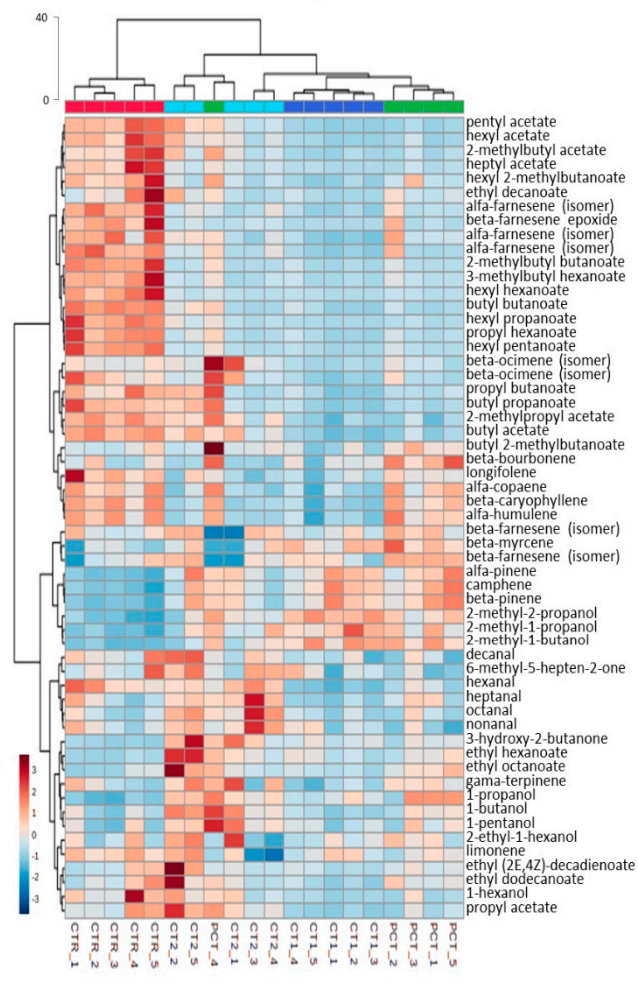

134 days

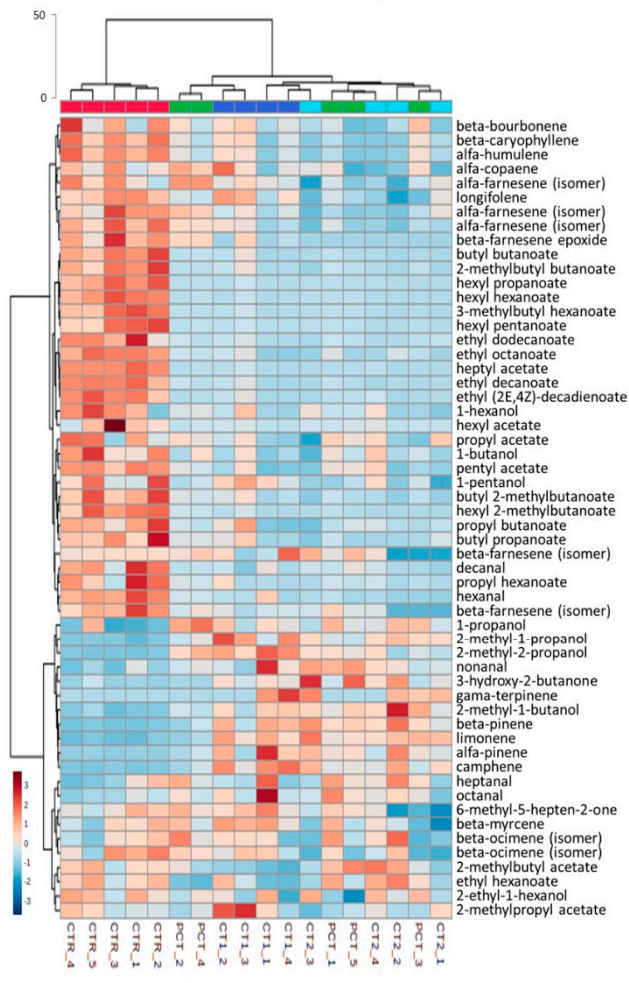

Supplement: s1 [file s1]

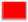

Supplement: s1 [file s1]

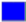

Supplement: s1 [file s1]

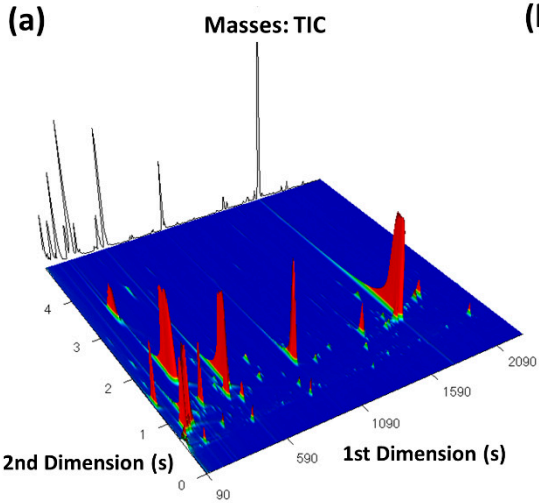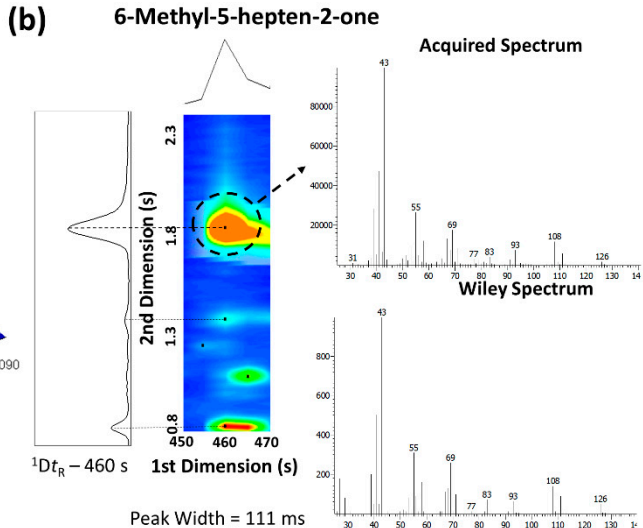

Supplement: s1 [file s1]

**(a) NA**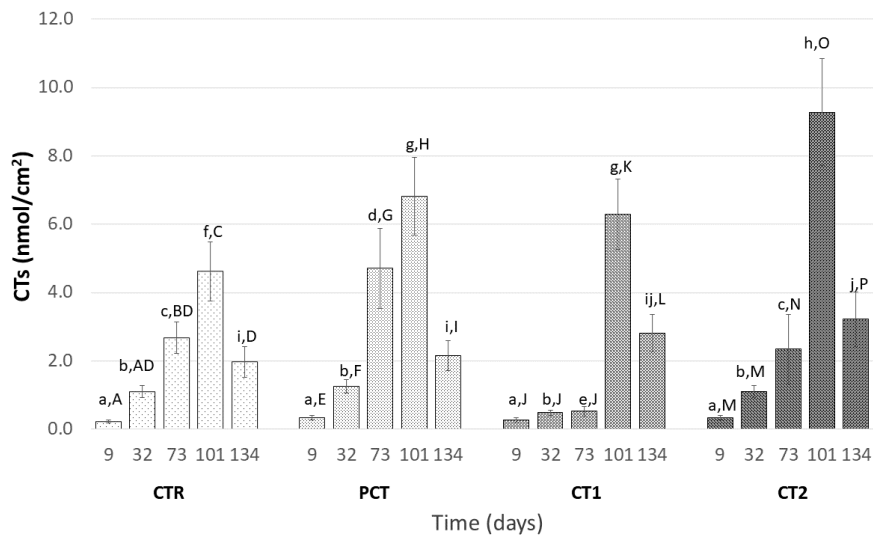**(b) DCA**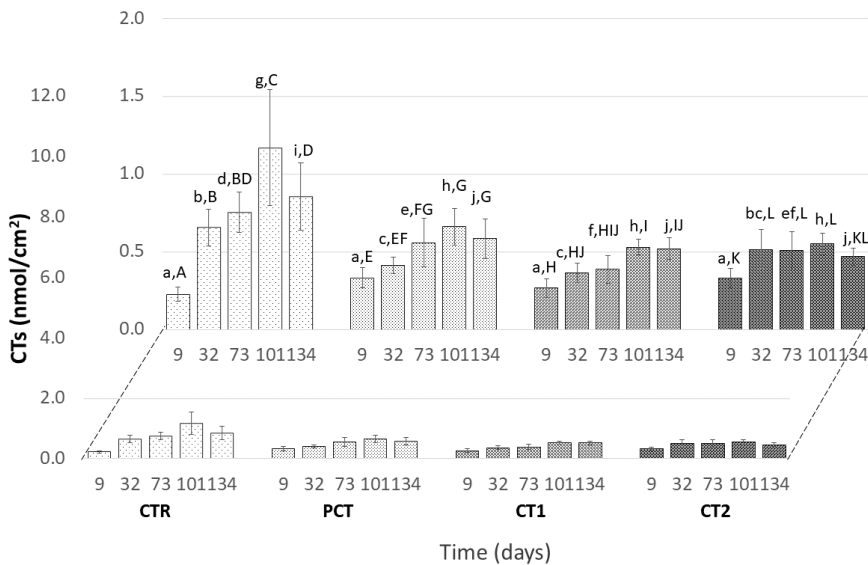

Supplement: s1 [file s1]

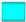

Supplement: s1 [file s1]

**NA**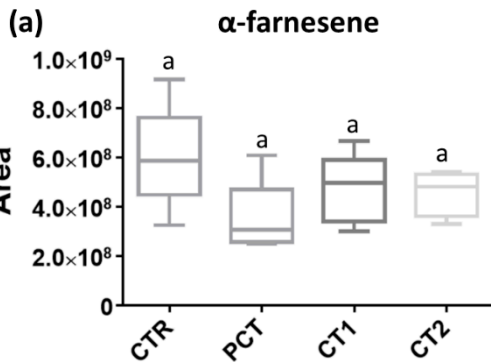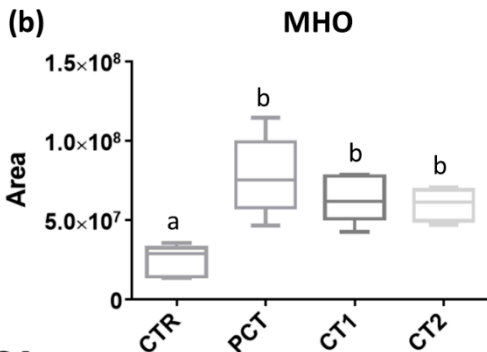**DCA**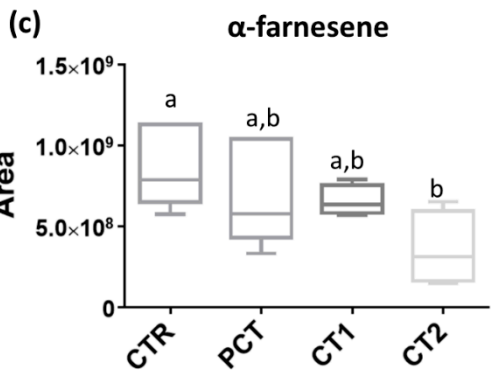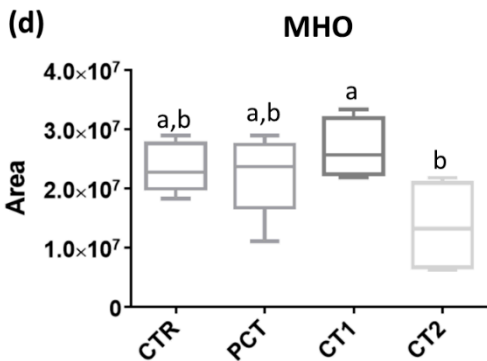

Supplement: s1 [file s1]

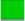

Supplement: s1 [file s1]

**(a) NA**

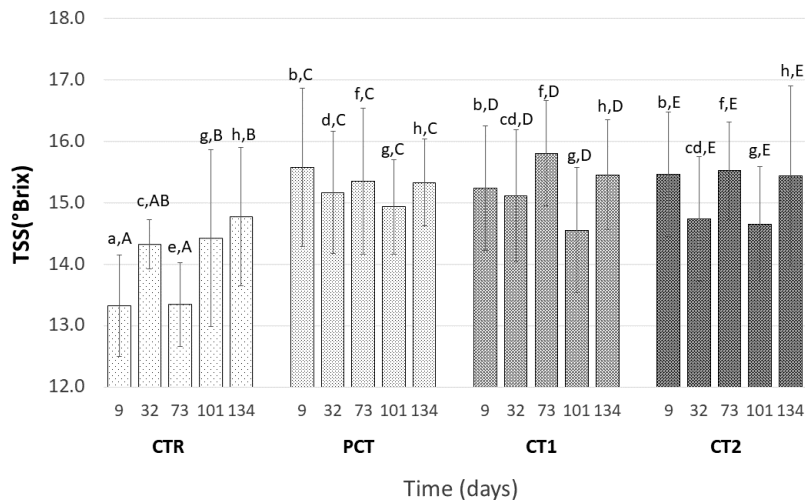

**(b) DCA**

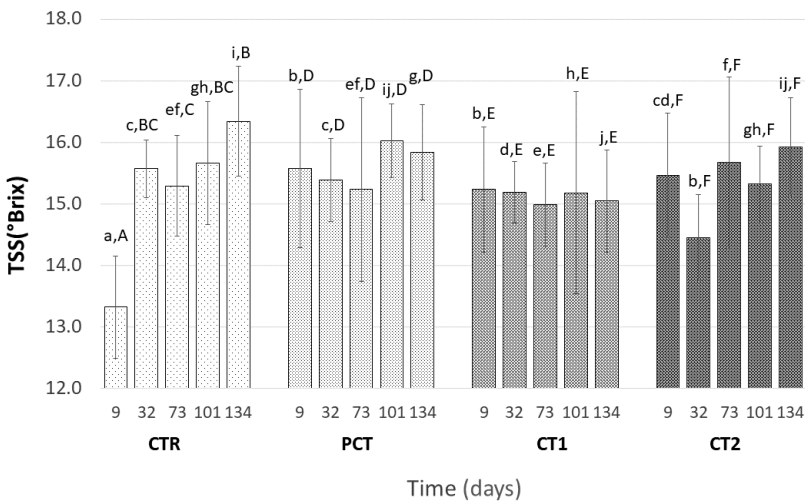

Supplement: s1 [file s1]

(a)

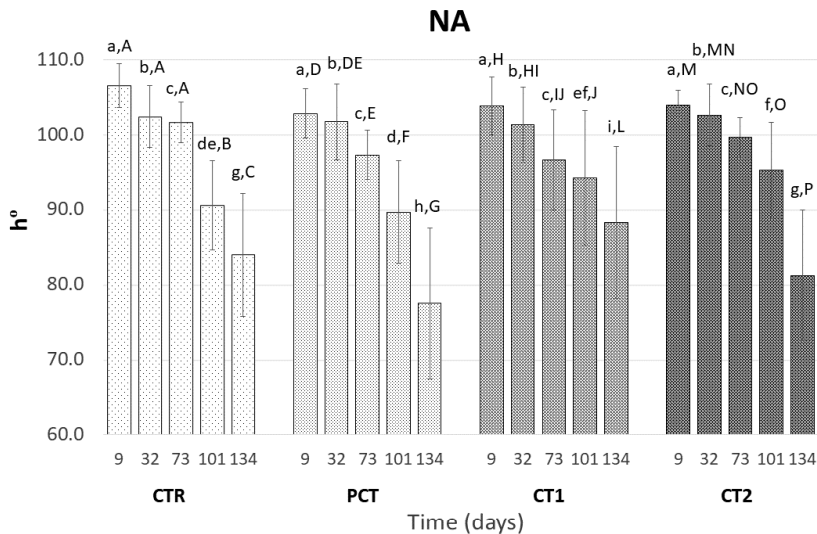

(b)

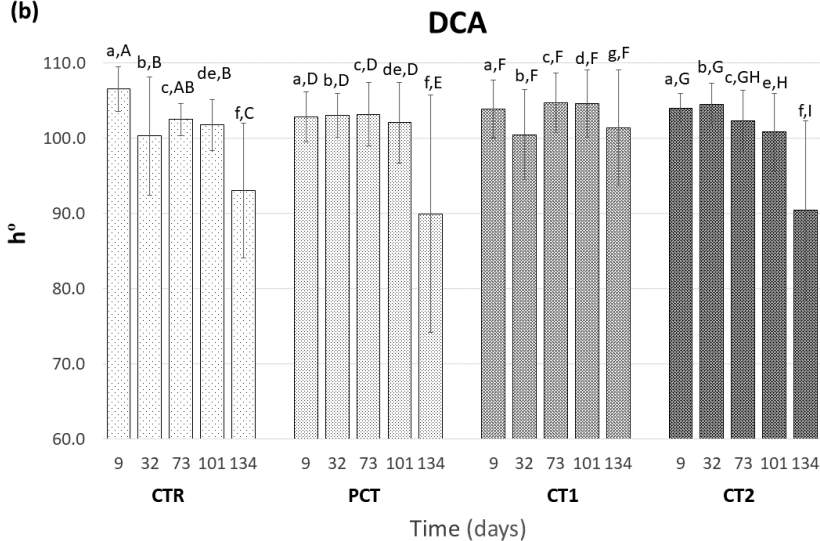

Supplement: s1 [file s1]

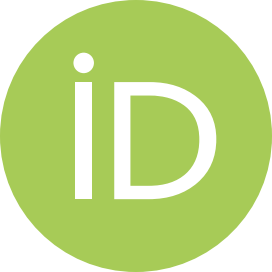

Supplement: s1 [file s1]
